# Supplementary material for: Social Interaction with an “Unidentified Moving Object” Elicits A-Not-B Error in Domestic Dogs
Source: PLoS One. 2016 Apr 13;11(4):e0151600. doi: 10.1371/journal.pone.0151600 (PMC4830451; doi:10.1371/journal.pone.0151600)
Supplement: S1 Table — (XLSX) [file pone.0151600.s001.xlsx]

## Sheet: subjects
ID	name	sex	breed	age (year)	Prior experience with the UMO	Condition	Comment
1	Shaggy	male	Nova Scotia Duck Tolling Retriever	8	Yes	Human
2	Maci	male	Mixed	5.5	Yes	Human
3	Marcipan	male	Hungarian Vizsla	1	No	Human
4	Redöny	male	Mixed	2	Yes	Human
5	Vackor	male	Pumi	7	No	Human
6	Jona	male	Havanese	10	Yes	Human
7	Alfie	male	German Shepherd Tervuren	1.5	No	Human
8	Fanta	female	Mixed	5	No	Human
9	Bony	female	Mixed	2	No	Human
10	Velur	female	Mixed	1.5	Yes	Human
11	Louisa	female	Mixed	3	No	Human
12	Dorka	female	Mixed	5	No	Human
13	Neo	female	Mixed	1.5	Yes	Human	Video is missing
14	Raiki	male	German Shepherd	3	Yes	Human
15	Guszti	male	Mixed	4	Yes	Human
16	Vito	male	Bullmastiff	6	No	Human
17	Ardie	male	Shetland Sheepdog	1	No	Social UMO
18	Nico	male	Boxer	5	Yes	Social UMO
19	Ada	female	Dobermann	10	No	Social UMO	excluded, due to car driving failure
20	Orca	female	German Shepherd	5	Yes	Social UMO
21	Bambus	female	Hungarian Vizsla	8	Yes	Social UMO
22	Lola	female	Boxer	6	Yes	Social UMO
23	Lina	female	Staffordshire Bull Terrier	4.5	No	Social UMO
24	Bonnie	female	Fox Terrier	4.5	Yes	Social UMO
25	Mabu	female	Fox Terrier	8.5	No	Social UMO
26	Joey	male	Cavalier King Charles Spaniel	1	No	Social UMO
27	Brigi	female	Hungarian Vizsla	9	No	Social UMO
28	Echo	male	Boucheron	4.5	No	Social UMO
29	Mishu	male	Mixed		Yes	Social UMO
30	Néro	male	Mixed	2.5	Yes	Social UMO
31	Manci	female	Hungarian Vizsla	6	No	Social UMO
32	Fruti	female	Mixed	4	Yes	Social UMO
33	Walther	male	Golden Retriever	2.5	Yes	Non-social UMO
34	Zselé	female	Mixed	4.5	Yes	Non-social UMO
35	Ropi	female	Mixed	9	Yes	Non-social UMO
36	Miro	male	Australian Shepherd	2	Yes	Non-social UMO
37	Ozzy	female	Australian Shepherd	6	Yes	Non-social UMO
38	Zazi	male	Shetland Sheepdog	11	No	Non-social UMO
39	Ciko	female	Howavart	11	No	Non-social UMO
40	Tria	female	Howavart	3	No	Non-social UMO
41	Heidi	female	Howavart	3	No	Non-social UMO
42	Füli	male	Mixed	11	No	Non-social UMO
43	Bodor	male	Mixed	9	Yes	Non-social UMO
44	Csele	female	Mudi	3	Yes	Non-social UMO
45	Lizy	female	German Shepherd	2	Yes	Non-social UMO
46	Lana	female	Croatian Sheepdog	3	No	Non-social UMO	Video is missing
47	Tódor	male	Border Collie	8.5	No	Non-social UMO
48	Sanyi	male	Mudi	7	No	Non-social UMO
